# Supplementary material
Source: PubMed Central journal article supplement (PMC7274136)
Supplement: NIHMS1590755-supplement-Suppl__Fig__1.pdf [file NIHMS1590755-supplement-Suppl__Fig__1.pdf]

Supplement Figure 1

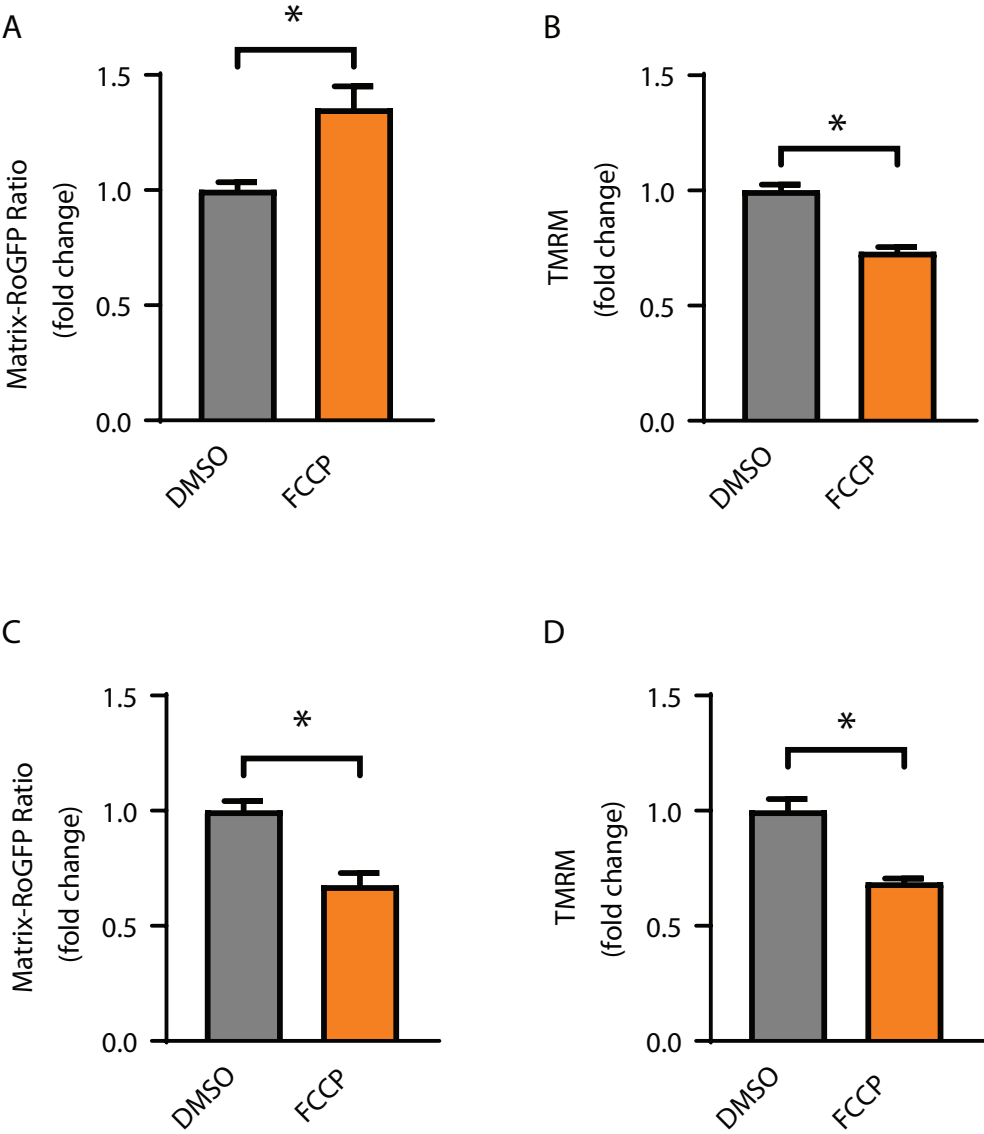

Supplement Figure 1. FCCP (1  $\mu$ M) treatment affects mitochondrial membrane potential and ROS production after short- and long-term exposure.

(A) Mitochondrial ROS production in BAECs transfected with Matrix-RoGFP followed by DMSO or FCCP treatment for 15 min. (B) Mitochondrial membrane potential in BAECs measured by TMRM fluorescence as in (A). Cells were loaded with 20 nM TMRM for 20 min. (C) Mitochondrial ROS production in BAECs transfected with Matrix-RoGFP followed by DMSO or FCCP treatment for 16 h. (D) Mitochondrial membrane potential in BAECs measured by TMRM fluorescence as in (C). Cells were loaded with 20 nM TMRM for 20 minutes.
